# Supplementary material for: Usability Test of Exercise Games Designed for Rehabilitation of Elderly Patients After Hip Replacement Surgery: Pilot Study
Source: PubMed Central journal article supplement (PMC5658642; doi:10.2196/games.7969), 2017-10-12
Supplement: games_v5i4e19_app3.pdf [file games_v5i4e19_app3.pdf]

# Questionnaires for the usability test of the Fietsgame

---

## Part one: basic demographic information

Before you start the exercise game, please fill in your information below.

Participant number: to be filled in by the experimenter ( )

Date of intake: \_\_\_\_\_

Number of exercise sessions per day: \_\_\_\_\_

Age: \_\_\_\_\_

Gender: \_\_\_\_\_

Language: \_\_\_\_\_

What is your highest level of education so far? \_\_\_\_\_

Visual acuity, left eye \_\_\_\_\_

Right eye \_\_\_\_\_

What is your sport habits? \_\_\_\_\_

How often do you play computer games?

- Never
- Occasionally (once or twice per month)
- Often but less than 50% of days
- 50 or more of days
- Everyday

Do you have photosensitive epilepsy?

- Yes
- No

Do you live alone or with someone else?

- I live alone
- I live with \_\_\_\_\_

## Part two: gaming experience

Game: \_\_\_\_\_

## Patient version

Now you'll see some statements about experiences. Please indicate, whether or not each statement applies to your experience. You can use the whole range of answers. There are no right or wrong answers, only your opinion counts. Please answer all these questions only referring to the last exercise game you experienced.

### Presence

---

In the computer generated world I had a sense of "being there".

not at all                              very much

-3      -2      -1      0      +1      +2      +3

---

### Enjoyment Scale

---

Do you find the exercise game interesting?

I dislike it                        I like it

-3      -2      -1      0      +1      +2      +3

---

### Perceived exertion

Please rate your perceived physical exertion during the game:

|    |                  |
|----|------------------|
| 6  |                  |
| 7  | Very, very light |
| 8  |                  |
| 9  | Very light       |
| 10 |                  |
| 11 | Fairly light     |
| 12 |                  |
| 13 | Somewhat hard    |
| 14 |                  |
| 15 | Hard             |
| 16 |                  |
| 17 | Very hard        |
| 18 |                  |
| 19 | Very, very hard  |
| 20 |                  |

### Visual Analog Scale (pain scale)

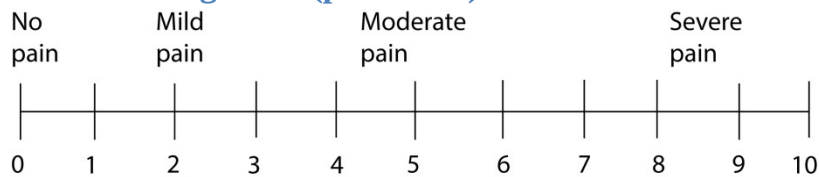

### Questions or comments

Do you have any questions or comments on this exercise game?

### Part three: Technology acceptance model

Please indicate, whether or not each statement applies to your experience. You can use the whole range of answers. There are no right or wrong answers, only your opinion counts. You will notice that some questions are very similar to each other. This is necessary for statistical reasons. Please answer all these questions only referring to all the exercise games you experienced.

#### Perceived usefulness

---

Using exercise game can enable me to complete rehabilitation more quickly.

strongly disagree                              strongly agree

-3      -2      -1      0      +1      +2      +3

---

Using exercise game CANNOT improve my rehabilitation.

strongly disagree                              strongly agree

-3      -2      -1      0      +1      +2      +3

---

Using exercise game can increase my productivity in rehabilitation.

strongly disagree                              strongly agree

-3      -2      -1      0      +1      +2      +3

---

Using exercise game CANNOT enhance my rehabilitation effectiveness.

Patient version

strongly disagree                                 strongly agree

-3      -2      -1      0      +1      +2      +3

---

Using exercise game can make my rehabilitation easier.

strongly disagree                              strongly agree

-3      -2      -1      0      +1      +2      +3

---

I would find exercise game NOT useful for my rehabilitation.

strongly disagree                              strongly agree

-3      -2      -1      0      +1      +2      +3

---

Perceived ease of use

---

Learning to operate exercise game would NOT be easy for me.

strongly disagree                              strongly agree

-3      -2      -1      0      +1      +2      +3

---

I would find it easy to get exercise game to do what I need to do in my rehabilitation.

strongly disagree                              strongly agree

-3      -2      -1      0      +1      +2      +3

---

My interaction with exercise game would be clear and understandable.

strongly disagree                              strongly agree

-3      -2      -1      0      +1      +2      +3

---

I find exercise game INFLEXIBLE to interact with.

Patient version

strongly disagree                          strongly agree

-3    -2    -1    0    +1    +2    +3

---

It is NOT easy for me to become skillful in using exercise game.

strongly disagree                          strongly agree

-3    -2    -1    0    +1    +2    +3

---

I would find exercise game easy to use.

strongly disagree                          strongly agree

-3    -2    -1    0    +1    +2    +3

---

**Attitude**

---

Using exercise game in rehabilitation is a good idea.

strongly disagree                          strongly agree

-3    -2    -1    0    +1    +2    +3

---

Using exercise game in rehabilitation is UNPLEASANT.

strongly disagree                          strongly agree

-3    -2    -1    0    +1    +2    +3

---

Using exercise game is beneficial for my rehabilitation.

strongly disagree                          strongly agree

-3    -2    -1    0    +1    +2    +3

---

**Intention to use**

---

Patient version

I intend to use exercise game in my rehabilitation when it becomes available in my home.

strongly disagree                                strongly agree

-3    -2    -1    0    +1    +2    +3

---

I intend to use exercise game as often as needed.

strongly disagree                                strongly agree

-3    -2    -1    0    +1    +2    +3

---

I intend NOT to use exercise game in rehabilitation routinely.

strongly disagree                                strongly agree

-3    -2    -1    0    +1    +2    +3

---

Whenever possible, I intend NOT to use exercise game in rehabilitation.

strongly disagree                                strongly agree

-3    -2    -1    0    +1    +2    +3

---

To the extent possible, I would use exercise game to do different things, clinical or nonclinical.

strongly disagree                                strongly agree

-3    -2    -1    0    +1    +2    +3

---

To the extent possible, I would use exercise game in rehabilitation frequently.

strongly disagree                                strongly agree

-3    -2    -1    0    +1    +2    +3

---

**Final questions**

In general, what did you like about your session on the exercise game?

Patient version

In general, what did you not like about your session on the exercise game?
